# Supplementary material for: O-Acetyl-GD2 as a Therapeutic Target for Breast Cancer Stem Cells
Source: PubMed Central journal article supplement (PMC8761789; doi:10.3389/fimmu.2021.791551), 2022-01-03
Supplement: Table_1.pdf [file Table_1.pdf]

**Supplementary data**

**Table 1**

**Clinical characteristics of PDXs**

| <b>PDX Code</b> | <b>Diagnosis</b>                   | <b>Stage</b> | <b>ER</b> | <b>PR</b> | <b>HER2</b> |
|-----------------|------------------------------------|--------------|-----------|-----------|-------------|
| <b>BC0145</b>   | IDC                                | IIIC         | —         | +         | +           |
| <b>BC0244</b>   | Carcinosarcoma                     | IIB          | —         | +         | —           |
| <b>BC0350R1</b> | Recurrent IDC                      | III          | —         | +         | +           |
| <b>BC0634</b>   | IDC                                | IIIA         | —         | +         | +           |
| <b>BCV108</b>   | IDC                                | IIB          | —         | —         | —           |
| <b>AS-B244</b>  | A subclone established from BC0244 |              |           |           |             |
